# Supplementary material for: Phylogenetic Analysis of Microbial Communities in Different Regions of the Gastrointestinal Tract in Panaque nigrolineatus, a Wood-Eating Fish
Source: PubMed Central journal article supplement (PMC3485024; doi:10.1371/journal.pone.0048018), 2012-10-25
Supplement: pone.0048018.s004.pdf [file pone.0048018.s004.pdf]

| <b>Bacterial Phylum/Class</b> | <b>Related Species</b>                   | <b>Accession #</b>                    | <b>Similarity (%)</b> | <b>Clones</b> |   |
|-------------------------------|------------------------------------------|---------------------------------------|-----------------------|---------------|---|
| <b>Alphaproteobacteria</b>    | <i>Agrobacterium</i> sp. Mei-Qs6         | EF090606                              | 99                    | 1             |   |
|                               | <i>Hyphomicrobium vulgare</i>            | AB543807                              | 95-98                 | 7             |   |
|                               | <i>Hyphomicrobium</i> sp. TW4            | AY934492                              | 96                    | 3             |   |
|                               | <i>Nordella</i> sp. P-63                 | AM411927                              | 96                    | 3             |   |
|                               | <i>Rubellimicrobium aerolatum</i>        | EU338486                              | 95                    | 1             |   |
|                               | <i>Rhizobiaceae</i> bacterium KVD-unk-43 | DQ490336                              | 95-96                 | 2             |   |
|                               | <i>Rhizobium</i> sp. 3-4                 | FJ598330                              | 98                    | 1             |   |
|                               | <i>Pleomorphomonas oryzae</i>            | AB159685                              | 99                    | 1             |   |
|                               | <i>Agrobacterium tumefaciens</i>         | DQ993282                              | 96                    | 1             |   |
|                               | <i>Mesorhizobium</i> sp. ORS1080         | AJ295082                              | 91                    | 1             |   |
|                               | <i>Holospira obtusa</i>                  | X58198                                | 92                    | 1             |   |
|                               | Alpha proteobacterium CRIB-02            | DQ123619                              | 98                    | 2             |   |
|                               | <b>Gammaproteobacteria</b>               | <i>Acidithiobacillus ferrooxidans</i> | AJ459800              | 85            | 1 |
|                               |                                          | <i>Legionella busanensis</i>          | NR_025196             | 91            | 6 |
| <i>Legionella taurinensis</i> |                                          | DQ667196                              | 84-86                 | 2             |   |
| <i>Legionella longbeachae</i> |                                          | FN650140                              | 91                    | 1             |   |
| <i>Legionella impletisoli</i> |                                          | AB233209                              | 87                    | 1             |   |
| <i>Legionella</i> sp. HB09011 |                                          | GU319886                              | 85                    | 1             |   |
| <i>Legionella yabuuchiae</i>  |                                          | AB233212                              | 91                    | 1             |   |
| <i>Legionella lytica</i>      |                                          | NR_026334                             | 95                    | 1             |   |
| <b>Clostridia</b>             | <i>Clostridium</i> sp. SL206             | EU816420                              | 94                    | 1             |   |
|                               | <i>Clostridium intestinale</i>           | AY781385                              | 99                    | 4             |   |
|                               | <i>Clostridium chromoreductans</i>       | AY228334                              | 99                    | 1             |   |
|                               | <i>Clostridium</i> sp. MK11              | AB275140                              | 97                    | 2             |   |
|                               | <i>Clostridium</i> sp. CYP5              | DQ479415                              | 98                    | 2             |   |
|                               | <i>Clostridium saccharolyticum</i>       | FJ957875                              | 97                    | 2             |   |
|                               | <i>Clostridium</i> sp. FRC C11           | EU331374                              | 99                    | 1             |   |
|                               | <i>Clostridium</i> sp. BL-26             | DQ196630                              | 99                    | 1             |   |
| <b>Flavobacteria</b>          | <i>Flavobacterium</i> sp. TISTR          | AB465580                              | 95-98                 | 4             |   |
| <b>Planctomycetacia</b>       | <i>Planctomyces</i> sp. (strain 599)     | AJ231189                              | 90-95                 | 3             |   |
|                               | <i>Pirellula</i> sp. (Schlesner 678)     | X81947                                | 85-86                 | 2             |   |
|                               | <i>Planctomyces</i> sp. (Schlesner 269)  | X81953                                | 89                    | 1             |   |
|                               | <i>Planctomycete</i> str. 292            | AJ231182                              | 91                    | 1             |   |
| <b>Bacilli</b>                | <i>Geobacillus pallidus</i>              | FJ808721                              | 99                    | 1             |   |
| <b>TM7</b>                    | TM7 phylum sp. oral taxon 355 clone      | GU410617                              | 87                    | 2             |   |
| <b>Total</b>                  |                                          |                                       |                       | 67            |   |
