# Supplementary material for: Phylogenetic Analysis of Microbial Communities in Different Regions of the Gastrointestinal Tract in Panaque nigrolineatus, a Wood-Eating Fish
Source: PubMed Central journal article supplement (PMC3485024; doi:10.1371/journal.pone.0048018), 2012-10-25
Supplement: pone.0048018.s005.pdf [file pone.0048018.s005.pdf]

| <b>Bacterial Phylum/Class</b>   | <b>Related Species</b>                   | <b>Accession #</b>                 | <b>Similarity (%)</b> | <b>Clones</b> |    |
|---------------------------------|------------------------------------------|------------------------------------|-----------------------|---------------|----|
| <b>Alphaproteobacteria</b>      | <i>Agrobacterium tumefaciens</i>         | GU479944                           | 96-98                 | 8             |    |
|                                 | <i>Rhizobium</i> sp. CHNTR26             | DQ337571                           | 97                    | 1             |    |
|                                 | <i>Rhizobium</i> sp. Qtx-14-2            | GU201841                           | 93                    | 1             |    |
|                                 | <i>Rhizobium</i> sp. R-31762             | AM403584                           | 99                    | 1             |    |
|                                 | <i>Agrobacterium vitis</i>               | EF590316                           | 90                    | 1             |    |
|                                 | <i>Rhizobium</i> sp. CTN-4               | FJ539087                           | 98                    | 1             |    |
|                                 | <i>Rhizobiales</i> bacterium D11-29      | AM403229                           | 99                    | 1             |    |
|                                 | <i>Paracoccus yeeii</i> strain H13       | AY014178                           | 99                    | 1             |    |
|                                 | <i>Sporocytophaga myxococcoides</i>      | NR_025463                          | 91                    | 1             |    |
|                                 | <i>Bosea</i> sp. TSA6w                   | AB542375                           | 99                    | 1             |    |
|                                 | <i>Rhizobium</i> sp. 4_C16_39            | EF540509                           | 98                    | 1             |    |
|                                 | <i>Amorphomonas oryzae</i>               | EU770254                           | 98                    | 1             |    |
|                                 | <i>Nordella</i> sp. P-63                 | AM411927                           | 93                    | 1             |    |
|                                 | <b>Betaproteobacteria</b>                | <i>Achromobacter xylosoxidans</i>  | AF531768              | 99            | 1  |
|                                 | <b>Clostridia</b>                        | <i>Clostridium saccharolyticum</i> | FJ957875              | 97-98         | 45 |
| <i>Clostridium</i> sp. CYP5     |                                          | DQ479415                           | 95                    | 1             |    |
| <i>Clostridium xylanovorans</i> |                                          | NR_028740                          | 95                    | 1             |    |
| <b>Flavobacteria</b>            | <i>Flavobacterium</i> sp. WB2.3-15       | AM934646                           | 97                    | 2             |    |
|                                 | <i>Flavobacterium</i> sp. WB3.4-76       | AM934664                           | 95                    | 1             |    |
|                                 | <i>Flavobacterium</i> sp. TISTR 1602     | AB465580                           | 98                    | 1             |    |
| <b>Planctomycetacia</b>         | <i>Planctomyces</i> sp. (Schlesner 269)  | X81953                             | 90                    | 2             |    |
|                                 | <i>Planctomyces maris</i>                | NR025327                           | 90                    | 1             |    |
|                                 | <i>Planctomycetales</i> bacterium VM20-7 | AB558583                           | 88                    | 1             |    |
| <b>Bacteroidetes</b>            | <i>Cytophaga hutchinsonii</i>            | CP000383                           | 89-92                 | 8             |    |
|                                 | <i>Pleomorphomonas oryzae</i>            | AY928261                           | 98                    | 2             |    |
| <b>Total</b>                    |                                          |                                    |                       | 86            |    |
