# Supplementary material for: Phylogenetic Analysis of Microbial Communities in Different Regions of the Gastrointestinal Tract in Panaque nigrolineatus, a Wood-Eating Fish
Source: PubMed Central journal article supplement (PMC3485024; doi:10.1371/journal.pone.0048018), 2012-10-25
Supplement: pone.0048018.s006.pdf [file pone.0048018.s006.pdf]

| <b>Bacterial Phylum/Class</b> | <b>Related Species</b>                                 | <b>Accession #</b> | <b>Similarity (%)</b> | <b>Clones</b> |
|-------------------------------|--------------------------------------------------------|--------------------|-----------------------|---------------|
| <b>Alphaproteobacterium</b>   | <i>Rhizobiaceae</i> bacterium KVD-unk-43               | DQ490336           | 96                    | 3             |
|                               | <i>Agrobacterium tumefaciens</i>                       | GU479944           | 96-98                 | 2             |
|                               | <i>Rhizobium</i> sp. gx-46                             | FJ823050           | 96                    | 2             |
|                               | Alpha proteobacterium KC-IT-W5                         | FJ711211           | 98                    | 1             |
|                               | <i>Sinorhizobium</i> sp. TB8-8-II                      | AY599696           | 95                    | 1             |
| <b>Betaproteobacteria</b>     | Beta proteobacterium KIN192<br>( <i>Comanodaceae</i> ) | AY136099           | 98-99                 | 13            |
|                               | <i>Acidovorax</i> sp. KNA-A                            | AB539974           | 99                    | 2             |
| <b>Gammaproteobacteria</b>    | <i>Aeromonas</i> sp. JD3                               | GU566315           | 99                    | 2             |
|                               | <i>Pseudoxanthomonas daejeonensis</i>                  | AY550264           | 98-99                 | 3             |
|                               | <i>Legionella londiniensis</i>                         | AB514842           | 92                    | 1             |
| <b>Flavobacteria</b>          | <i>Flavobacterium</i> sp. B4                           | EU194891           | 95-97                 | 39            |
|                               | <i>Flavobacterium</i> sp. TISTR 1602                   | AB465580           | 95-98                 | 10            |
|                               | <i>Flavobacterium ahuensis</i>                         | GQ284450           | 97                    | 4             |
|                               | <i>Flavobacterium</i> sp. 001xTSA12A_C04               | HM113609           | 96                    | 1             |
|                               | <i>Flavobacterium</i> sp. WB2.3-9                      | AM934644           | 97                    | 1             |
|                               | Glacier bacterium FJS20                                | AY315160           | 97                    | 1             |
| <b>Planctomycetacia</b>       | <i>Pirellula staleyi</i>                               | CP001848           | 90                    | 1             |
|                               | <i>Planctomyces maris</i>                              | NR025327           | 88                    | 1             |
|                               | <i>Planctomyces</i> sp.(Schlesner 658)                 | X81954             | 96                    | 1             |
| <b>Bacteroidetes</b>          | <i>Sporocytophaga myxococcoides</i>                    | NR025463           | 92                    | 1             |
| <b>Bacilli</b>                | <i>Paenibacillus</i> sp. Sptzw07                       | GU377098           | 98                    | 1             |
|                               | <i>Paenibacillus</i> sp. PALXIL05                      | DQ407279           | 98                    | 1             |
| <b>Sphingobacteria</b>        | <i>Saprosiraceae</i> bacterium MS-Wolf1-H              | AJ786322           | 85                    | 1             |
| <b>Acidobacteria</b>          | <i>Acidobacteria</i> bacterium IGE-011                 | GU187027           | 88                    | 1             |
| <b>Total</b>                  |                                                        |                    |                       | 94            |
