# Supplementary material for: Phylogenetic Analysis of Microbial Communities in Different Regions of the Gastrointestinal Tract in Panaque nigrolineatus, a Wood-Eating Fish
Source: PubMed Central journal article supplement (PMC3485024; doi:10.1371/journal.pone.0048018), 2012-10-25
Supplement: pone.0048018.s007.pdf [file pone.0048018.s007.pdf]

| <b>Bacterial Phylum/Class</b>      | <b>Related Species</b>               | <b>Accession #</b>                   | <b>Similarity (%)</b> | <b>Clones</b> |   |
|------------------------------------|--------------------------------------|--------------------------------------|-----------------------|---------------|---|
| <b>Alphaproteobacterium</b>        | <i>Agrobacterium tumefaciens</i>     | DQ993282                             | 96-97                 | 12            |   |
|                                    | <i>Amorphomonas oryzae</i>           | AB233493                             | 97-98                 | 8             |   |
|                                    | <i>Rhizobium</i> sp. CTN-4           | FJ539087                             | 98                    | 5             |   |
|                                    | Rape rhizosphere bacterium tsb077    | AJ295454                             | 99                    | 4             |   |
|                                    | <i>Rhizobiaceae</i> bacterium M238   | AB461714                             | 98                    | 1             |   |
|                                    | <i>Agrobacterium</i> sp. AL060301_26 | FJ593844                             | 97                    | 1             |   |
|                                    | <i>Catellibacterium</i> A1-9         | EU313813                             | 97                    | 1             |   |
|                                    | <i>Methylobacterium zatmanii</i>     | AB175647                             | 99                    | 1             |   |
|                                    | <b>Gammaproteobacteria</b>           | <i>Stenotrophomonas maltophilia</i>  | GU254017              | 99            | 1 |
|                                    |                                      | <i>Legionella</i> sp. CDC-3558-AUS-E | FJ236837              | 87            | 1 |
| <i>Enterobacter</i> sp. GIST-NKst3 |                                      | EF489445                             | 99                    | 1             |   |
| <b>Flavobacteria</b>               | <i>Flavobacterium</i> sp. B46        | EU194891                             | 96                    | 3             |   |
|                                    | <i>Flavobacterium ahuensis</i>       | GQ284450                             | 97                    | 3             |   |
| <b>Clostridia</b>                  | <i>Clostridium saccharolyticum</i>   | FJ957875                             | 97-98                 | 33            |   |
|                                    | <i>Clostridium</i> sp. BL-26         | DQ196630                             | 99                    | 1             |   |
|                                    | <i>Clostridium tunisiense</i>        | AY187622                             | 95                    | 1             |   |
| <b>Planctomycetacia</b>            | <i>Planctomyces</i> sp. (strain 599) | AJ231189                             | 91                    | 1             |   |
| <b>Bacteroidetes</b>               | <i>Bacteroides xylanolyticus</i>     | DQ497992                             | 99                    | 2             |   |
| <b>Actinobacteria</b>              | <i>Nesterenkonia flava</i>           | EF680886                             | 99                    | 2             |   |
| <b>Cyanobacteria</b>               | <i>Merismopedia glauca</i>           | X94705                               | 84                    | 1             |   |
| <b>Total</b>                       |                                      |                                      |                       | 83            |   |
