# Supplementary material for: Phylogenetic Analysis of Microbial Communities in Different Regions of the Gastrointestinal Tract in Panaque nigrolineatus, a Wood-Eating Fish
Source: PubMed Central journal article supplement (PMC3485024; doi:10.1371/journal.pone.0048018), 2012-10-25
Supplement: pone.0048018.s008.pdf [file pone.0048018.s008.pdf]

| Bacterial Phylum/Class                  | Related Species                           | Accession #                          | Similarity (%) | Clones |   |
|-----------------------------------------|-------------------------------------------|--------------------------------------|----------------|--------|---|
| <b>Alphaproteobacteria</b>              | <i>Agrobacterium tumefaciens</i>          | GU479944                             | 96-99          | 3      |   |
|                                         | <i>Sphingomonadaceae</i> bacterium PB307  | AB220143                             | 88             | 1      |   |
|                                         | <i>Rhodobacter blasticus</i>              | DQ342322                             | 97             | 1      |   |
|                                         | <i>Devosia</i> sp. T15                    | FJ687971                             | 98             | 1      |   |
|                                         | Bacterium 081631 ( <i>Sphingomonas</i> )  | AB202227                             | 90             | 1      |   |
|                                         | Alpha proteobacterium BAC233              | EU180520                             | 95             | 1      |   |
|                                         | <i>Sinorhizobium</i> sp. XLL-7            | EF027003                             | 95             | 1      |   |
|                                         | <i>Agrobacterium tumefaciens</i>          | GU479944                             | 97             | 1      |   |
|                                         | <i>Sphingomonas</i> sp. SIA181-1A1        | AF395032                             | 89             | 1      |   |
|                                         | <b>Betaproteobacterium</b>                | <i>Roseateles depolymerans</i>       | AM990542       | 94-99  | 6 |
| Beta proteobacterium A0618              |                                           | AF236006                             | 99             | 1      |   |
| Beta proteobacterium KIN192             |                                           | AY136099                             | 95-98          | 2      |   |
| Beta proteobacterium OcN1               |                                           | AF331976                             | 96             | 2      |   |
| <i>Methylophilus leisingeri</i>         |                                           | AB193725                             | 97             | 2      |   |
| <i>Acidovorax</i> sp. R-25052           |                                           | AM084039                             | 97             | 1      |   |
| <i>Aquabacterium</i> sp. P-136          |                                           | AM412127                             | 99             | 2      |   |
| <i>Vogesella</i> sp. TPS6               |                                           | FJ821602                             | 89             | 1      |   |
| <i>Azonexus fungiphilus</i>             |                                           | NR_024853                            | 96-99          | 3      |   |
| <i>Thiobacter subterraneus</i>          |                                           | NR_024834                            | 92             | 1      |   |
| Beta proteobacterium OS-19              |                                           | AB076848                             | 98             | 1      |   |
| <i>Burkholderiales</i> bacterium MSMB34 |                                           | EF114435                             | 96             | 1      |   |
| <i>Chitinimonas taiwanensis</i>         |                                           | GQ284441                             | 99             | 1      |   |
| <i>Pelomonas</i> sp. On15               |                                           | DQ291149                             | 98             | 1      |   |
| <i>Pelomonas puraquae</i>               |                                           | AM501441                             | 95             | 1      |   |
| <i>Dechloromonas</i> sp. PC1            |                                           | AY126452                             | 97             | 2      |   |
| <i>Pelomonas aquatic</i>                |                                           | AM501435                             | 98             | 1      |   |
| <i>Aquabacterium hongkongensis</i>      |                                           | DQ489306                             | 99             | 1      |   |
| <i>Ideonella</i> sp. B513               |                                           | AB049107                             | 97             | 1      |   |
| <i>Ralstonia eutropha</i>               |                                           | AF027407                             | 95             | 1      |   |
| <i>Pelomonas saccharophila</i>          |                                           | FJ513082                             | 99             | 2      |   |
| <i>Azospira restricta</i>               |                                           | DQ974114                             | 90             | 1      |   |
| <i>Mitsuaria chitosanitabida</i>        |                                           | AM501442                             | 91-94          | 2      |   |
| <i>Burkholderiales</i> bacterium TP320  |                                           | EF636151                             | 98             | 1      |   |
| <b>Gammaproteobacteria</b>              |                                           | <i>Pseudomonas</i> sp. JPB-1.12      | EU652471       | 96     | 1 |
|                                         |                                           | <i>Pseudomonas</i> sp. BBCT8         | DQ337559       | 99     | 1 |
| <b>Deltaproteobacteria</b>              |                                           | <i>Chondromyces crocatus</i>         | FJ176772       | 90     | 1 |
| <b>Flavobacteria</b>                    |                                           | <i>Flavobacterium</i> sp. TISTR 1602 | AB465580       | 95-97  | 4 |
|                                         |                                           | <i>Flavobacterium</i> sp. ARSA-108   | GU295968       | 96     | 1 |
|                                         |                                           | <i>Flavobacterium</i> sp. B46        | EU194891       | 94     | 1 |
|                                         | <i>Flavobacteriaceae</i> bacterium R2A-16 | EU581834                             | 93             | 1      |   |
| <b>Clostridia</b>                       | <i>Clostridium</i> sp. PPf35E10           | AY548785                             | 94             | 1      |   |
|                                         | <i>Sporacetigenium mesophilum</i>         | AY682207                             | 96             | 1      |   |
|                                         | Red Sea bacterium KT-2K1                  | AJ309522                             | 98             | 1      |   |
|                                         | <i>Clostridium</i> sp. Kas202-1           | AB114252                             | 96             | 1      |   |
|                                         | <i>Tepidibacter formicigenes</i>          | FN666239                             | 94-95          | 2      |   |
| <b>Planctomycetacia</b>                 | <i>Planctomycete</i> A-2                  | AM056027                             | 78-82          | 2      |   |
|                                         | <i>Gemmata</i> -like str. CJuq14          | AF239693                             | 99             | 1      |   |
| <b>Bacteroidetes</b>                    | <i>Bacteroidetes</i> bacterium N2         | AB540001                             | 92-93          | 2      |   |
|                                         | <i>Cytophaga hutchinsonii</i>             | CP000383                             | 90             | 1      |   |
|                                         | <i>Bacteroidetes</i> bacterium 10AO       | GU117703                             | 88             | 1      |   |
|                                         | Bacterium TG141                           | AB308367                             | 93             | 2      |   |

|                        |                                     |          |       |    |
|------------------------|-------------------------------------|----------|-------|----|
|                        | <i>Bacteroidetes</i> bacterium ArSB | AB539997 | 96    | 1  |
| <b>Bacilli</b>         | <i>Paenibacillus</i> sp. PALXIL05   | DQ407279 | 95-98 | 7  |
|                        | <i>Paenibacillus</i> sp. Sptzw08    | GU377099 | 98    | 1  |
| <b>Negativicutes</b>   | <i>Anaerospora hongkongensis</i>    | AY372052 | 99    | 1  |
| <b>Verrucomicrobia</b> | <i>Opitutus</i> sp. VeSm13          | X99392   | 95    | 2  |
| <b>Cyanobacteria</b>   | <i>Nostoc</i> sp. NTK29             | DQ513319 | 96    | 1  |
|                        |                                     |          |       |    |
| <b>Total</b>           |                                     |          |       | 87 |
